# Supplementary material
Source: PubMed Central journal article supplement (PMC3013037)

## Supplemental Figures

Fig. S1. Subcellular localization of MAG in the developing brain of wild-type and shiverer mice. Immunohistochemistry of brain sections of P7, P14 and P21 wild-type mice for MAG as well as of P21 shiverer mice is shown. Bars, 50  $\mu$ m.

Fig. S2. Costaining of MAG and Olig2. Immunohistochemistry of brain sections of P21 wild-type and P21 shiverer mice is shown for MAG and Olig2. Cells that express MAG in the cell body are also positive for Olig2

Fig. S3. Exosome-like vesicles do not affect the mTOR pathway. Primary oligodendrocytes were cultured for 3 days and subsequently incubated with neuronal conditioned medium (NCM) and exosomes as indicated. Cell lysates were analyzed by Western blotting using antibody specific for phosphorylated Akt (Ser-473), Akt, phosphorylated ribosomal subunit 6 (Ser-236, 236) and for actin as a loading control.

Figure S1

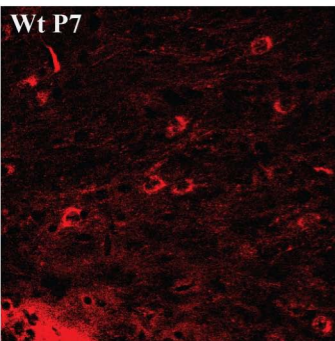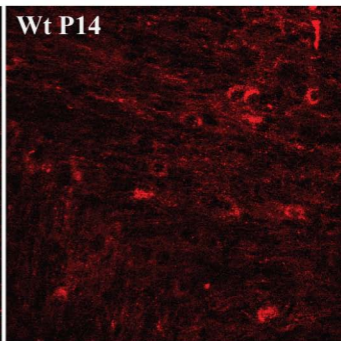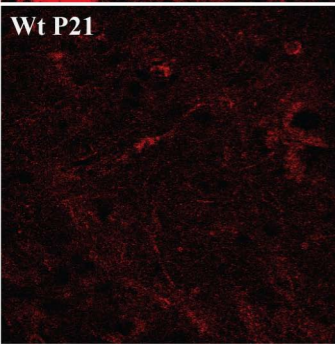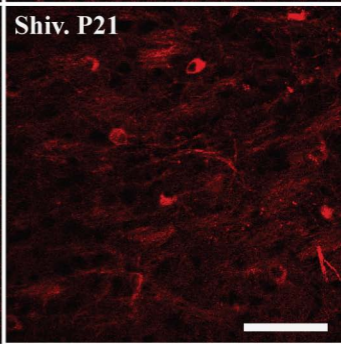

Figure S2

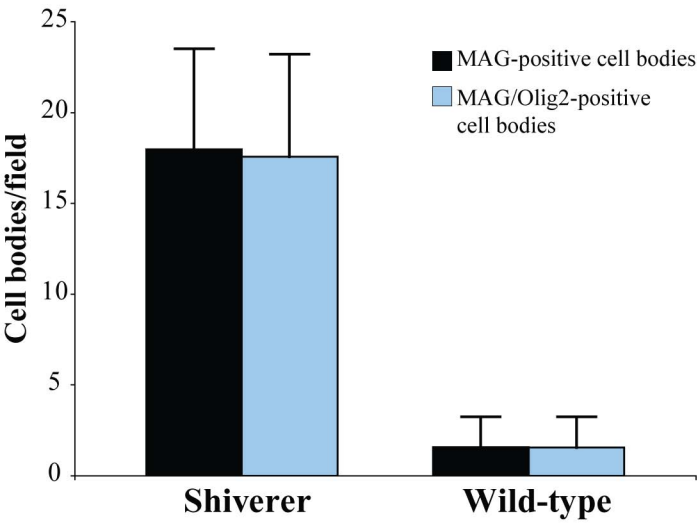

Figure S3

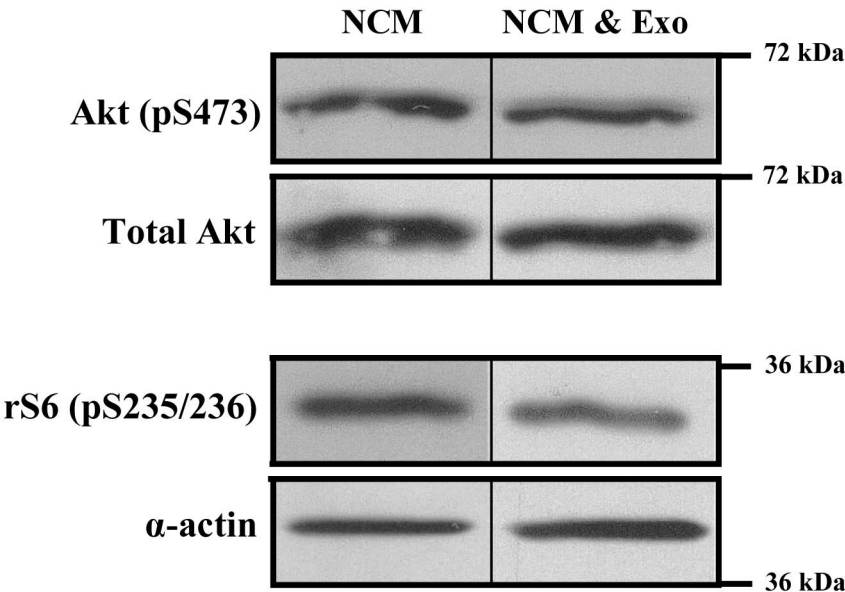

Supplement: supp_M110.190009_jbc.M110.190009-1.pdf [file supp_M110.190009_jbc.M110.190009-1.pdf]
